# Supplementary material for: Responsive self-assembly of tectoRNAs with loop–receptor interactions from the tetrahydrofolate (THF) riboswitch
Source: PubMed Central journal article supplement (PMC6614920; doi:10.1093/nar/gkz304), 2019-05-02
Supplement: gkz304_supplemental_file.pdf [file gkz304_supplemental_file.pdf]

|                                            |                                                   |
|--------------------------------------------|---------------------------------------------------|
| NTPs (25 mM each)                          | 20 $\mu$ L                                        |
| DTT (100 mM)                               | 2.0 $\mu$ L                                       |
| Inorganic Pyrophosphatase (0.1 U/ $\mu$ l) | 6.0 $\mu$ L                                       |
| RNasin (40u/ $\mu$ l)                      | 1.5 $\mu$ L                                       |
| T7 RNA polymerase (150 Units)              | 1-7.5 $\mu$ L                                     |
| H2O (nanopure)                             | (final volume of mix is 160 $\mu$ L per reaction) |
| PCR DNA template purified                  | ~40 $\mu$ L                                       |

Reaction mixtures were incubated at 37°C for 4 hours. After 4 hours, 2  $\mu$ L of RQ1 DNase (10 U/ $\mu$ l) (New England Biolabs) was added and mixture was incubated for an additional 20 minutes to degrade the DNA templates.

*RNA Purification and Isolation:* To each reaction mixture 75  $\mu$ l of urea blue (0.05% bromophenol, 0.05% xylene cyanol, 8M urea, 20 mM EDTA) was added and samples were heated at 90°C for 2 minutes before being loaded onto a denaturing polyacrylamide gel (8-10%, acrylamide bisacrylamide (19:1), 8 M urea). Samples were run for approximately 1.5 hours at 35W. Gel pieces containing RNA were visualized by UV shadowing technique, removed, and placed in elution buffer (200 mM NaCl, 10 mM Tris pH 7.5, 0.5 mM NaEDTA) and shook at 5°C overnight. The next morning the liquid was removed from the sample tubes, 900  $\mu$ L of 100% ethanol was added to each tube, and samples were stored at -20°C for 2 hours to precipitate the RNA. Samples were spun for 1 hour at 12,000 rpm. The majority of the liquid was removed, washed with 90% ethanol, and spun at 12,000 rpm to stabilize the RNA pellet. This liquid was removed and sample was washed one final time. RNA was reconstituted in nanopure water and concentrations were determined using a nanodrop UV-Vis spectrometer (Thermo Fisher Scientific).

## B. Supplemental Tables

**Table S1:** Alignment of unique loop-receptor sequences. Adapted from (1). The 5' receptor, loop, and 3' receptor regions are separated by dashes. Accession numbers are shown where the last bolded three number designations in blue represent the working name of each given sequence. Sequence signatures are grouped according to uniqueness by black dashed lines. For example, sequence 980 has the same loop-receptor sequence as the first 12 other THF riboswitches. For consensus sequence: red, 95% conserved; black, 85% conserved; gray, 75% conserved; R= A or G; Y= U or C; W=A or U. For alignment: underlined nts, loop-receptor duplex with WC and non-canonical bps; gray shading, WC bps; green shading, G-U bps.

2D

Consensus

>NZ\_AAYG02000031.1/153078-152**980**  
>NZ\_AAXG02000014.1/43071-43187  
>BABE01004909.1/284-381  
>NZ\_ABAW02000025.1/72799-72896  
>NC\_009706.1/3903929-3904044  
>BABA01009937.1/46-141  
>BAAV01010818.1/618-715  
>BAAX01022545.1/141-43  
>NZ\_ABED02000024.1/137574-137672  
>BABG01004557.1/3-100  
>BAAX01002679.1/2103-2006  
>BAAU01000940.1/627-724  
>hgutS7\_s7\_164370/285-380  
.....  
>NZ\_AASF01001777.1/1578-1**480**  
.....  
>BABB01000157.1/63-**158**  
>BABF01004573.1/52-147  
>BABG01026644.1/586-688  
>NZ\_ABCC02000039.1/266095-266205  
>hgutS7\_s7\_168056/60-187  
.....  
>BAAU01016335.1/416-**525**  
.....  
>NZ\_ABCA03000044.1/64560-64460 (**3SUX**)  
.....  
>NC\_008525.1/1424554-1424**642**  
.....  
>NZ\_ABDQ01000031.1/13491-13**593**  
>NC\_008593.1/1647712-1647607  
>NZ\_AAVC01000075.1/8139-8248  
>NC\_009699.1/914572-914676  
>NC\_009495.1/892227-892331  
.....  
>BAAZ01020636.1/794-**894**  
.....  
>BABE01001528.1/194-**88**  
.....  
>hgutS8\_s8\_179091/613-719  
.....  
>NZ\_AAVO02000004.1/164832-164**736**  
>BABE01017430.1/618-522  
>hgutS7\_s7\_164211.1/947-835  
.....  
>BAAZ01000245.1/2377-**2470**  
.....  
>NC\_009633.1/4463946-4464**038**  
.....  
>NC\_009922.1/2619446-2619**544**  
.....  
>NC\_004557.1/1800312-1800**211**  
>NC\_003030.1/2534634-2534**731**  
.....  
>BABD01033677.1/236-**329**  
.....  
>NC\_009706.1/1524321-1524**441**  
.....  
>NC\_004350.1/559729-559641 (**4LVV**)  
.....  
>NZ\_ABEE02000015.1/221133-221**224**  
.....  
>JCVI\_SCAF\_1101668087879/886-**799**  
.....  
>NC\_009442.1/125748-125**890**  
.....  
>NZ\_AAOZ01000019.1/12278-12**377**  
>NC\_004668.1/903576-903**739**  
.....  
>NZ\_AAAK03000102.1/3116-3216  
.....  
>NC\_009633.1/4839802-4839**709**  
.....  
>NC\_007576.1/348925-349**019**  
.....  
>NC\_008526.1/2247840-2247748  
>NC\_008497.1/852209-852**116**  
.....  
>NZ\_AAPZ02000001.1/1062273-1062**367**  
.....  
>NC\_007929.1/1666649-1666554  
>NC\_010609.1/1983266-1983360  
.....  
>NC\_008531.1/123971-124**060**  
.....  
>BABA01028836.1/1**06-1**  
.....  
>NZ\_AASF01001777.1/1578-**1480**  
.....

L1-2 P3 L3 P3' L2-1  
AGUA-GRAY.GGGRWGUUGYY-GCAUYCCG  
AGUA-GGAC.GGGGAGUUGCC-GCAUCCCC  
AGUA-GGAC.GGGGAGUUGCC-GCAUCCCC  
AGUA-GAAC.GGGGAGUUGUC-GCAUCCCC  
AGUA-GAAC.GGGGAGUUGUC-GCAUCCCC  
AGUA-GAAC.GGGGAGUUGUC-GCAUCCCC  
AGUA-AGAC.GGGGAGUUGCU-GCAUCCCC  
AGUA-GUAC.GGGGAGUUGAC-GCAUCCCC  
AGUA-CAAC.GGGGAGUUGUG-GCAUCCCC  
AGUA-CAAC.GGGGAGUUGUG-GCAUCCCC  
AGUA-CAAC.GGGGAGUUGUG-GCAUCCCC  
AGUA-CAAC.GGGGAGUUGUG-GCAUCCCC  
AGUA-CAAC.GGGGAGUUGUG-GCAUCCCC  
AGUA-ACAC.GGGGAGUUGGU-GCAUCCCC  
AGCA-GGAC.GGGGAGUUGUC-GCAUCCCC  
AGUA-GAAC.AGGGAGUUGUC-GCAUCCCC  
AGUA-GAAC.AGGGAGUUGUC-GCAUCCCC  
AGUA-GAAC.AGGGAGUUGUC-GCAUCCCC  
AGUA-GGAC.AGGGAGUUGUC-GCAUCCCC  
AGUA-GAAC.AGGGAGUAGUC-GCAUCCCC  
AGUA-GGAC.GGGGAGUUGUC-GCAUCCCC  
AGUA-AGAC.GGAGAGUUGUC-GCAUCCCC  
AGUA-GAAC.GGGAGUUGUC-GCAUCCCC  
AGUA-GAAC.GGGAGUUGUC-GCAUCCCC  
AGUA-GGAC.GGGAGUUGUC-GCAUCCCC  
AGUA-GGAC.GGGAGUUGUC-GCAUCCCC  
AGUA-AAACGGGAGUUGUU-GCAUCCCC  
AGUA-GGCU.GGGGAGUCGCC-GCA.CCCG  
AGUA-GGCU.GGGGAGUCGCC-GCA.CCCG  
AAUA-GAAU.GGGGAGUUGUC-GCA.CCCG  
AAUA-GAAU.GGGGAGUUGUC-GCA.CCCG  
AAUA-GGAU.GGGGAGUUGCC-GCA.CCCG  
AGUA-GGAU.GGGAGUUGCC-GCAA.CCG  
AGUA-GGAU.GGGAGUUGUC-GCGU.CCA  
AGUA-GGAU.GGGAGUUGCC-GCAU.CCG  
AGUA-GGAU.AGGAUGUUGCC-GUUU.CCG  
AGUA-GGAU.GGGAGUUGUC-GUUU.CCG  
AGUA-GGAU.GGGAGUUGUC-GUUU.CCG  
AGUA-GAAU.GGGAGUUGUC-GUUU.CCG  
AGUA-GAAU.GGGAUGUCGUC-GCAU.CCG  
AGUA-AGAU.GGGAUGUUGUC-GCAU.CCA  
AGUA-AAAU.GGGUUGUUGUU-GCAA.CCG  
AGUA-GGAU.GGGUUGUUGCC-GCAU.CCG  
AGUA-GGAU.GGGACUUGCC-GCGU.CCG  
AGUA-GGAU.GGGAUGUUGCC-GCAU.CG  
AGUA-GGAU.GGGAUGUUGCC-GCAU.CG  
AGUA-GGAU.GGAAUGUUGA-GCGUU.CG  
AGUA-GAAC.GGAAUGU.GAA-GCAU.CG  
AGUA-GAAC.GGAAUGU.GAA-GCAU.CG  
AGUA-GAAC.GCAAUGU.GAA-GCAU.GG  
GGUA-GAAC.GGAAUGU.GAA-GCAU.CA  
GGUA-GAAC.GGAAUGU.GAA-GCAU.CA  
GGUA-GAAC.GGAAUGU.GAA-GCAU.CA  
GGUA-AGAC.GGAAUGU.GAG-GUUGU.AG  
AGUA-ACCG.GGGACGU.GAC-GUCGUCCG  
CUCA-GAGC.GGAGCCUGUC-GCCUAU

**Table S2.** Average  $K_d$  and standard deviation for each molecule at varying stem lengths tested in TB buffer (89mM Tris-borate, pH 8.2, 50mM KCl, and 2mM  $Mg^{2+}$ ) at 7°C. Further details are listed in the Material and Methods.

| THF loop-receptor | Equilibrium Dissociation Constant ( $K_d$ in nM) |                      |                    |
|-------------------|--------------------------------------------------|----------------------|--------------------|
|                   | 9 base pair                                      | 10 base pair         | 11 base pair       |
| 4LVV              | 492 ( $\pm 74$ )                                 | 252 ( $\pm 94$ )     | 98 ( $\pm 8$ )     |
| 3SUX              | > 20000                                          | > 20000              | 2534 ( $\pm 396$ ) |
| 980               | 550 ( $\pm 204$ )                                | 30 ( $\pm 16$ )      | 26 ( $\pm 6$ )     |
| 593               | > 20000                                          | 18228 ( $\pm 1902$ ) | 5148 ( $\pm 474$ ) |
| 158               | 2624 ( $\pm 664$ )                               | 2052 ( $\pm 128$ )   | 1190 ( $\pm 268$ ) |

**Table S3:** Average  $K_d$ ,  $\Delta G$ , and  $\Delta\Delta G$  values for tectoRNAs in the absence and presence of folic acid (FA).  $\Delta\Delta G_{FA}$  values correspond to the difference in  $\Delta G$  between control (no folic acid) and the  $\Delta G$  of each respective construct in the presence of 200  $\mu M$  FA. All  $K_d$ s were measured at 7°C and 1mM  $Mg^{2+}$  except the 3SUX variants, which did not dimerize in these conditions and were instead tested at 2 mM  $Mg^{2+}$  to achieve dimer formation. Data represent the average and standard deviation from a minimum of three independent experiments. 4LVV stands for 4LVV\_11 (Table S4).

| Molecule | $K_d$ (no FA)        | $\Delta G$ (no FA)   | $K_d$ (+FA)         | $\Delta G$ (+FA)     | $\Delta\Delta G_{FA}$ |
|----------|----------------------|----------------------|---------------------|----------------------|-----------------------|
| 980      | 1944 ( $\pm 108$ )   | -7.32 ( $\pm 0.03$ ) | 28 ( $\pm 2$ )      | -9.67 ( $\pm 0.04$ ) | -2.35 ( $\pm 0.05$ )  |
| 148      | 540 ( $\pm 20$ )     | -8.03 ( $\pm 0.02$ ) | 104 ( $\pm 28$ )    | -8.94 ( $\pm 0.15$ ) | -0.91 ( $\pm 0.15$ )  |
| 4LVV     | 1072 ( $\pm 20$ )    | -7.65 ( $\pm 0.01$ ) | 86 ( $\pm 12$ )     | -9.05 ( $\pm 0.08$ ) | -1.40 ( $\pm 0.08$ )  |
| 4LVV_9   | 3694 ( $\pm 432$ )   | -6.96 ( $\pm 0.07$ ) | 74 ( $\pm 6$ )      | -9.13 ( $\pm 0.05$ ) | -2.17 ( $\pm 0.08$ )  |
| 4LVV_9.1 | 2338 ( $\pm 114$ )   | -7.21 ( $\pm 0.03$ ) | 978 ( $\pm 30$ )    | -7.69 ( $\pm 0.02$ ) | -0.48 ( $\pm 0.03$ )  |
| 3SUX*    | 2534 ( $\pm 396$ )   | -7.17 ( $\pm 0.09$ ) | 3918 ( $\pm 1132$ ) | -6.92 ( $\pm 0.16$ ) | 0.25 ( $\pm 0.18$ )   |
| 3SUX.1*  | 13640 ( $\pm 2694$ ) | -6.23 ( $\pm 0.11$ ) | 9786 ( $\pm 2136$ ) | -6.41 ( $\pm 0.12$ ) | -0.18 ( $\pm 0.16$ )  |

**Table S4:** List of tectoRNA constructs tested in this study with their corresponding Kds and free energies. Data represent the average and standard deviation from a minimum of three independent experiments performed in presence of 2 mM Mg(OAc)<sub>2</sub> at 7°C.

| Name             | TectoRNA Sequence                                                                                 | Interaction                    | Kd nM         | ΔG(kcal/mol)  |
|------------------|---------------------------------------------------------------------------------------------------|--------------------------------|---------------|---------------|
| 4LVV_9           | 5' -gGGACAGAGUAAGGUA AAC--GGAU- <u>GGGAUGUCG</u> UC--GUUUACC <u>GCAUC-CG</u> CUGUCC               | 5' AUGGGGAUGUCG<br>3' GCCUACG  | 492 (±74)     | -8.08 (±0.08) |
| 4LVV_10          | 5' -gGGACAGAGUAAGGUA AAC--GGAU- <u>GGGAUGUCG</u> UC-UGUUUACC <u>GCAUC-CG</u> CUGUCC               | 5' AUGGGGAUGUCG<br>3' GCCUACG  | 250 (±94)     | -8.46 (±0.21) |
| 4LVV_11<br>(641) | 5' -gGGACAGAGUAAGGUA AACAGGG <u>AU-<u>GGGAUGUCG</u></u> UCCUGUUUACC <u>GCAUC-CG</u> CUGUCC        | 5' AUGGGGAUGUCG<br>3' GCCUACG  | 98 (±8)       | -8.98 (±0.05) |
| 3SUX_9           | 5' -gGGACAGAGUAAGGUA AAC--GG <u>AC-<u>GGGGAGUUG</u></u> UC--GUUUACC <u>GCAUCUCG</u> CUGUCC        | 5' ACGGGGAGUUG<br>3' GCUCUACG  | >20000        | N.A.          |
| 3SUX_10          | 5' -gGGACAGAGUAAGGUA AAC--GG <u>AC-<u>GGGGAGUUG</u></u> UC-UGUUUACC <u>GCAUCUCG</u> CUGUCC        | 5' ACGGGGAGUUG<br>3' GCUCUACG  | >20000        | N.A.          |
| 3SUX_11<br>(460) | 5' -gGGACAGAGUAAGGUA AACAGGG <u>AC-<u>GGGGAGUUG</u></u> UCCUGUUUACC <u>GCAUCUCG</u> CUGUCC        | 5' ACGGGGAGUUG<br>3' GCUCUACG  | 2534 (±396)   | -7.17 (±0.09) |
| 980_9            | 5' -gGGACAGAGUAAGGUA AAC--GG <u>AC-<u>GGGGAGUUG</u></u> UC--GUUUACC <u>GCAUCCCG</u> CUGUCC        | 5' ACGGGGAGUUG<br>3' GCCCUACG  | 550 (±202)    | -8.02 (±0.20) |
| 980_10           | 5' -gGGACAGAGUAAGGUA AAC--GG <u>AC-<u>GGGGAGUUG</u></u> UC-UGUUUACC <u>GCAUCCCG</u> CUGUCC        | 5' ACGGGGAGUUG<br>3' GCCCUACG  | 30 (±16)      | -9.64 (±0.30) |
| 980_11           | 5' -gGGACAGAGUAAGGUA AACAGGG <u>AC-<u>GGGGAGUUG</u></u> UCCUGUUUACC <u>GCAUCCCG</u> CUGUCC        | 5' ACGGGGAGUUG<br>3' GCCCUACG  | 26 (±6)       | -9.72 (±0.13) |
| 158_9            | 5' -gGGACAGAGUAAGGUA AAC--GG <u>AC-<u>AGGGAGUUG</u></u> UC--GUUUACC <u>GCAUCCCG</u> CUGUCC        | 5' ACAGGGGAGUUG<br>3' GCCCUACG | 2624 (±664)   | -7.15 (±0.14) |
| 158_10           | 5' -gGGACAGAGUAAGGUA AAC--GG <u>AC-<u>AGGGAGUUG</u></u> UC-UGUUUACC <u>GCAUCCCG</u> CUGUCC        | 5' ACAGGGGAGUUG<br>3' GCCCUACG | 2052 (±128)   | -7.29 (±0.03) |
| 158_11           | 5' -gGGACAGAGUAAGGUA AACAGGG <u>AC-<u>AGGGAGUUG</u></u> UCCUGUUUACC <u>GCAUCCCG</u> CUGUCC        | 5' ACAGGGGAGUUG<br>3' GCCCUACG | 1190 (±268)   | -7.59 (±0.12) |
| 593_9            | 5' -gGGACAGAGUAAGGUA AAC--GG <u>AC-<u>GGGAAGUUG</u></u> UC--GUUUACC <u>GCAUCCCG</u> CUGUCC        | 5' ACGGGAAGUUG<br>3' GCCUACG   | >20000        | N.A.          |
| 593_10           | 5' -gGGACAGAGUAAGGUA AAC--GG <u>AC-<u>GGGAAGUUG</u></u> UC-UGUUUACC <u>GCAUCCCG</u> CUGUCC        | 5' ACGGGAAGUUG<br>3' GCCUACG   | 18226 (±1904) | -6.07 (±0.06) |
| 593_11           | 5' -gGGACAGAGUAAGGUA AACAGGG <u>AC-<u>GGGAAGUUG</u></u> UCCUGUUUACC <u>GCAUCCCG</u> CUGUCC        | 5' ACGGGAAGUUG<br>3' GCCUACG   | 5148 (±472)   | -6.77 (±0.05) |
| 736              | 5' -gGGACAGAAUAAGGUA AACAGGG <u>AU-<u>GGGGAGUUG</u></u> UCCUGUUUACC <u>GCA-<u>CCCG</u></u> CUGUCC | 5' AUGGGGAGUUG<br>3' GCCCAG    | 34 (±20)      | -9.57 (±0.33) |

|                |                                                                                     |                              |               |               |
|----------------|-------------------------------------------------------------------------------------|------------------------------|---------------|---------------|
| 736.1          | 5' -gGGACAGAGUAAGGUA AACAGGGAU- <u>GGGAGUUG</u> UCCUGUUUACC <u>GCA-CCC</u> GUGUCC   | 5' AUGGGGAGUUG<br>3' GCCCACG | 84 (±26)      | -9.06 (±0.17) |
| 488            | 5' -gGGACAGAGUAAGGUA AACAGGGCU- <u>GGGAGUUG</u> UCCUGUUUACC <u>GCA-CCC</u> GUGUCC   | 5' CUGGGGAGUCG<br>3' GCCCACG | 180 (±54)     | -8.64 (±0.17) |
| 488.1          | 5' -gGGACAGAGUAAGGUA AACAGGGAU- <u>GGGAGUUG</u> UCCUGUUUACC <u>GCA-CCC</u> GUGUCC   | 5' AUGGGGAGUCG<br>3' GCCCACG | 256 (±18)     | -8.44 (±0.04) |
| 731            | 5' -gGGACAGAGUAAGGUA AACAGGGAU- <u>GGGAAGUUG</u> UCCUGUUUACC <u>GCUUC-CG</u> GUGUCC | 5' AUGGGAAGUUG<br>3' GCCUUCG | 46 (±16)      | -9.40 (±0.19) |
| 739            | 5' -gGGACAGAGUAAGGUA AACAGGGAU- <u>GGGAAGUUG</u> UCCUGUUUACC <u>GCAUJ-CG</u> GUGUCC | 5' AUGGGAAGUUG<br>3' GCUUACG | 11368 (±1180) | -6.33 (±0.06) |
| 799            | 5' -gGGACAGAGUAAGGUA AACAGGGAU- <u>GGGUUGUUG</u> UCCUGUUUACC <u>GCAAC-CG</u> GUGUCC | 5' AUGGGUUGUUG<br>3' GCCAACG | 182 (±30)     | -8.63 (±0.09) |
| 038            | 5' -gGGACAGAGUAAGGUA AACAGGGAU- <u>GGGAAGUUG</u> UCCUGUUUACC <u>GCGUC-CA</u> GUGUCC | 5' AUGGGAAGUUG<br>3' ACCUGCG | 184 (±16)     | -8.63 (±0.05) |
| 038.1          | 5' -gGGACAGAGUAAGGUA AACAGGGAU- <u>GGGAAGUUG</u> UCCUGUUUACC <u>GCGUC-CG</u> GUGUCC | 5' AUGGGAAGUUG<br>3' GCCUGCG | 42 (±20)      | -9.45 (±0.26) |
| 224            | 5' -gGGACAGAGUAAGGUA AACAGGGAU- <u>GGGAAGUUG</u> UCCUGUUUACC <u>GCAUC-CA</u> GUGUCC | 5' AUGGGAAGUUG<br>3' ACCUACG | 50 (±22)      | -9.35 (±0.24) |
| 224.1          | 5' -gGGACAGAGUAAGGUA AACAGGGAU- <u>GGGAAGUUG</u> UCCUGUUUACC <u>GCAUC-CG</u> GUGUCC | 5' AUGGGAAGUUG<br>3' GCCUACG | 28 (±4)       | -9.68 (±0.08) |
| 709            | 5' -gGGACAGAGUAAGGUA AACAGGGAU- <u>GGAACGUUG</u> UCCUGUUUACC <u>GCGUU-CG</u> GUGUCC | 5' AUGGAACGUUG<br>3' GCUUGCG | 362 (±54)     | -8.25 (±0.08) |
| 544            | 5' -gGGACAGAGUAAGGUA AACAGGGAU- <u>GGGAAGUUG</u> UCCUGUUUACC <u>GCAUC-CG</u> GUGUCC | 5' AUGGGAAGUUG<br>3' GCCUACG | 180 (±14)     | -8.64 (±0.04) |
| 544.1          | 5' -gGGACAGAGUAAGGUA AACAGGGAU- <u>GGGAAGUUG</u> UCCUGUUUACC <u>GCAUC-CG</u> GUGUCC | 5' AUGGGAAGUUG<br>3' GCCUACG | 50 (±20)      | -9.35 (±0.22) |
| 211            | 5' -gGGACAGAGUAAGGUA AACAGGGAU- <u>AGGAAGUUG</u> UCCUGUUUACC <u>GCUUC-CG</u> GUGUCC | 5' AUAGGAAGUUG<br>3' GCCUUCG | 2218 (±118)   | -7.24 (±0.03) |
| 367            | 5' -gGGACAGCGUAAGGUA AACAGGGAC- <u>GGAAGU-G</u> UCCUGUUUACC <u>GCAUJ-CA</u> GUGUCC  | 5' ACGGAAUGUG<br>3' ACUUACG  | >20000        | N.A.          |
| 060            | 5' -gGGACAGCGUAAGGUA AACAGGGAC- <u>GGAAGU-G</u> UCCUGUUUACC <u>UGUU-AG</u> GUGUCC   | 5' ACGGAAUGUG<br>3' GAUUGUG  | >20000        | N.A.          |
| 019<br>(367.1) | 5' -gGGACAGAGUAAGGUA AACAGGGAC- <u>GGAAGU-G</u> UCCUGUUUACC <u>GCAUJ-CG</u> GUGUCC  | 5' ACGGAAUGUG<br>3' GCUUACG  | 8580 (±446)   | -6.49 (±0.03) |
| 061            | 5' -gGGACAGAGUAAGGUA AACAGGGCG- <u>GGGACGU-G</u> UCCUGUUUACC <u>GUCGUCC</u> GUGUCC  | 5' CGGGGACGUG<br>3' GCCUGCUG | 80 (±20)      | -9.09 (±0.14) |

|        |                                                                       |                               |             |               |
|--------|-----------------------------------------------------------------------|-------------------------------|-------------|---------------|
| 470    | 5' -gGGACAGAGUAAGGUA AACAGGGAU- GGGAGGUUGUCCUGUUUACC GCAAC-CG CUGUCC  | 5' AUGGGAGGUUG<br>3' GCCAACG  | 2700 (±642) | -7.13 (±0.13) |
| 148    | 5' -gGGACAGAGCAAGGUA AACAGGGAC- GGGGAGUUGUCCUGUUUACC GCAUCCCG CUGUCC  | 5' ACGGGGAGUUG<br>3' GCCCUACG | 344 (±96)   | -8.28 (±0.15) |
| 441    | 5' -gGGACAGAGUAAGGUA AACAGGGAU- GGGAGGUUGUCCUGUUUACC GCUUC-CG CUGUCC  | 5' AUGGGAGGUUG<br>3' GCCUUCG  | 30 (±2)     | -9.64 (±0.04) |
| 894    | 5' -gGGACAGAGUAAGGUA AACAGGGACGGGGAAGUUGUCCUGUUUACC GCAUCCCG CUGUCC   | 5' ACGGGGAAGUUG<br>3' GCCUACG | 738 (±44)   | -7.86 (±0.03) |
| 480    | 5' -gGGACAGACUCAAGGUA AACAGGGCC- GGAGCGCUGUCCUGUUUACC GCCUAUUU CUGUCC | 5' GCGGAGCGCUG<br>3' UUUAUCCG | >20000      | N.A.          |
| 480.1  | 5' -gGGACAGAGUAAGGUA AACAGGGAC- GGAGCGCUGUCCUGUUUACC GCCUAUUG CUGUCC  | 5' ACGGAGCGCUG<br>3' GUUAUCCG | >20000      | N.A.          |
| 890    | 5' -gGGACAGAGUAAGGUA AACAGGGAU- GGGGUGUUGUCCUGUUUACC GCAUC-CG CUGUCC  | 5' AUGGGGUGUUG<br>3' GCCUACG  | 166 (±48)   | -8.69 (±0.16) |
| 980.1  | 5' --GGACAGAGUAAGGUA AACAGGGAU- GGGGAGUUGUCCUGUUUACC GCAUCCCG CUGUCC  | 5' AUGGGGAGUUG<br>3' GCCCUACG | 84 (±18)    | -9.06 (±0.12) |
| 980.2  | 5' --GGACAGAGUAAGGUA AACAGGGAC- GGGGAGUUGUCCUGUUUACC G-AUCCCG CUGUCC  | 5' ACGGGGAGUUG<br>3' GCCCUAG  | 282 (±56)   | -8.39 (±0.11) |
| 980.3  | 5' --GGACAGAGUAAGGUA AACAGGGAC- GGGGAGUUGUCCUGUUUACC G-CUCCCG CUGUCC  | 5' ACGGGGAGUUG<br>3' GCCCUCG  | 46 (±6)     | -9.40 (±0.07) |
| 980.4  | 5' --GGACAGAGUAAGGUA AACAGGGAC- GGGGAGUUGUCCUGUUUACC GCCUCCCG CUGUCC  | 5' ACGGGGAGUUG<br>3' GCCCUCCG | 56 (±12)    | -9.29 (±0.12) |
| 980.5  | 5' --GGACAGAGUAAGGUA AACAGGGAU- GGGGAGUUGUCCUGUUUACC G-AUCCCG CUGUCC  | 5' AUGGGGAGUUG<br>3' GCCCUAG  | 22 (±2)     | -9.81 (±0.05) |
| 980.6  | 5' --GGACAGAGUAAGGUA AACAGGGAU- GGGGAGUUGUCCUGUUUACC GC-UCCCG CUGUCC  | 5' AUGGGGAGUUG<br>3' GCCCUCG  | 20 (±2)     | -9.86 (±0.06) |
| 980.7  | 5' -gGGACAGAGUAAGGUA AACAGGGAC- GAGGAGUUGUCCUGUUUACC GCAUCCCG CUGUCC  | 5' ACGAGGAGUUG<br>3' GCCCUACG | >20000      | N.A.          |
| 980.8  | 5' -gGGACAGAGUAAGGUA AACAGGGAC- GGGGAGUUGUCCUGUUUACC GCAUCCUG CUGUCC  | 5' ACGGGGAGUUG<br>3' GUCCUACG | >20000      | N.A.          |
| 980.9  | 5' -gGGACAGAGUAAGGUA AACAGGGAC- GAGGAGUUGUCCUGUUUACC GCAUCCUG CUGUCC  | 5' ACGAGGAGUUG<br>3' GUCCUACG | 122 (±24)   | -8.86 (±0.11) |
| 980.10 | 5' -gGGACAGAGUAAGGUA AACAGGGAC- CGGGAGUUGUCCUGUUUACC GCAUCCCG CUGUCC  | 5' ACCGGGAGUUG<br>3' GCCCUACG | 22 (±2)     | -9.81 (±0.05) |
| 980.11 | 5' -gGGACAGAGUAAGGUA AACAGGGAC- GCGGAGUUGUCCUGUUUACC GCAUCCGG CUGUCC  | 5' ACGCGGAGUUG<br>3' GGCCUACG | 30 (±16)    | -9.64 (±0.30) |

|                        |                                                                    |                               |               |               |
|------------------------|--------------------------------------------------------------------|-------------------------------|---------------|---------------|
| 980.12                 | 5' -gGGACAGAGUAAGGUAACAGGGAC-GGCGAGUUGUCCUGUUUACC GCAUCGCG CUGUCC  | 5' ACGGCGAGUUG<br>3' GCGCUACG | 790 (±298)    | -7.82 (±0.21) |
| 980.13                 | 5' -gGGACAGAGCAAGGUAACAGGGAC-GGGGAGCUGUCCUGUUUACC GCAUCCCG CUGUCC  | 5' ACGGGGAGCUG<br>3' GCCCUACG | 1086 (±54)    | -7.64 (±0.03) |
| 980.14                 | 5' -gGGACAGAGUAAGGUAACAGGGAC-GGAGAGUUGUCCUGUUUACC G-AUCUCG CUGUCC  | 5' ACGGAGAGUUG<br>3' GCUCUAG  | 36 (±18)      | -9.54 (±0.28) |
| 593.1                  | 5' -gGGACAGAGUAAGGUAACAGGGAC-GGGGAGUUGUCCUGUUUACC GCAUCCCG CUGUCC  | 5' ACGGGGAGUUG<br>3' GCCUACG  | 364 (±126)    | -8.25 (±0.19) |
| 4LVV.1                 | 5' -gGGACAGAGUAAGGUAACAGGGAU-GGGUUGUCGUCCUGUUUACC GCAAC-CG CUGUCC  | 5' AUGGGUUGUCG<br>3' GCCAACG  | 2194 (±116)   | -7.25 (±0.03) |
| 4LVV.2                 | 5' -gGGACAGAGUAAGGUAACAGGGAU-GGGAGUCGUCCUGUUUACC GCAUC-CG CUGUCC   | 5' AUGGGAAGUCG<br>3' GCCUACG  | 8822 (±988)   | -6.48 (±0.06) |
| 4LVV.3                 | 5' -gGGACAGAGUAAGGUAACAGGGAU-GGGUAGUCGUCCUGUUUACC GCAAC-CG CUGUCC  | 5' AUGGGUAGUCG<br>3' GCCAACG  | >20000        | N.A.          |
| 4LVV.4                 | 5' -gGGACAGAGUAAGGUAACAGGGAU-GGGAGUCGUCCUGUUUACC GCUUC-CG CUGUCC   | 5' AUGGGAAGUCG<br>3' GCCUUCG  | 20 (±2)       | -9.86 (±0.06) |
| 4LVV_9.1               | 5' -gGGACAGAGCAAGGUAAC--GGAU-GGGAGUCGUC--GUUUACC GCAUC-CG CUGUCC   | 5' AUGGGAAGUCG<br>3' GCCUACG  | 494 (±62)     | -8.08 (±0.07) |
| 3SUX.1                 | 5' -gGGACAGAGCAAGGUAACAGGGAC-GGGGAGUUGUCCUGUUUACC GCAUCUCG CUGUCC  | 5' ACGGGGAGUUG<br>3' GCUCUACG | 13640 (±2634) | -6.23 (±0.11) |
| 377                    | 5' -gGGACAGAGUAAGGUAACAGGGAU-GGGACGUUGUCCUGUUUACC GCGUC-CG CUGUCC  | 5' AUGGGACGUUG<br>3' GCCUCG   | Not tested    |               |
| 525                    | 5' -gGGACAGAGUAAGGUAACAGGGAC-AGGGAGUAGUCCUGUUUACC GCAUCCCG CUGUCC  | 5' AUGGGACGUUG<br>3' GCCCUACG | Not tested    |               |
| 642                    | 5' -gGGACAGAGUAAGGUAACAGGGAC-GGAGAGUUGUCCUGUUUACC GCAUCUCG CUGUCC  | 5' ACGGAGAGUUG<br>3' GCUCUACG | Not tested    |               |
| 116                    | 5' -gGGACAGAGUAAGGUAACAGGGAC-GCAAUGU-GUCCUGUUUACC GCAUUG-GG CUGUCC | 5' ACGCAAUGUG<br>3' GGUUACG   | Not tested    |               |
| <b>Heterodimer R+L</b> |                                                                    |                               |               |               |
| R980                   | 5'-gGGACAGAGUAGAAGUUCGGGG—AA-----ACUUGGUUCUUCGCAUCCCGCUGUCC        |                               | N.A.          |               |
| L980                   | 5'----GGGAUAUGGAAGUUCAGGAC-GGGGAGUUGUCUGGUUCUUCUAAGUCCCU           |                               | N.A.          |               |
| R980+L980              | - FA                                                               |                               | 38 (±7)       |               |
| R980+L980              | + FA                                                               |                               | <1            |               |



## C. Supplemental Figures

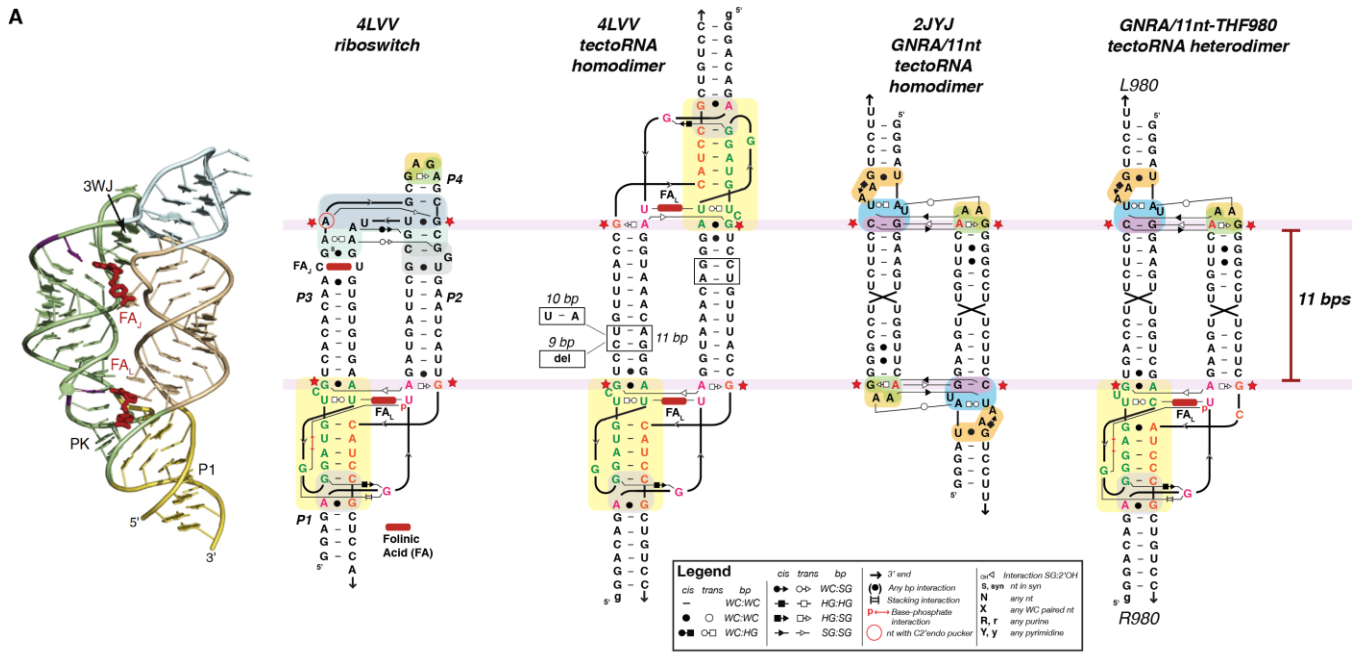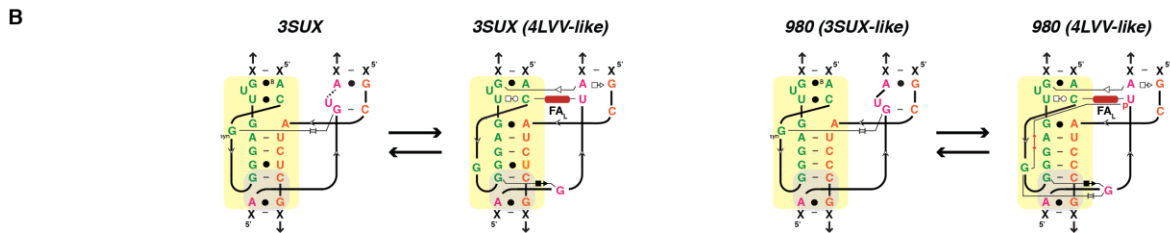

**Figure S1: Comparison of the secondary structure diagrams of THF riboswitch [pdb\_ID: 4LVV], THF tectoRNA homodimer, GAAA/11nt tectoRNA homodimer [according to pdb\_ID: 2JYJ] and THF tectoRNA heterodimer.** (A) The 3D schematic of the THF riboswitch on the far left is adapted from ref. (2). The distance separating the G:A mediated interactions (indicated by red stars) is 11bps in all structural contexts. The nomenclature for non-canonical base pairs and tertiary interactions are according to references (3,4). In the boxed legend: WC, Watson-Crick edge; HG, Hoogsteen edge; SG, shallow groove edge. (B) 2D diagrams of 3SUX and 980 interactions. The THF interaction might adopt two alternative structures. The conformations on the left and right correspond to the pattern of tertiary contacts observed in the crystallographic structures 3SUX and 4LVV, respectively. Note that 3SUX and 980 differ at only one nucleotide position.

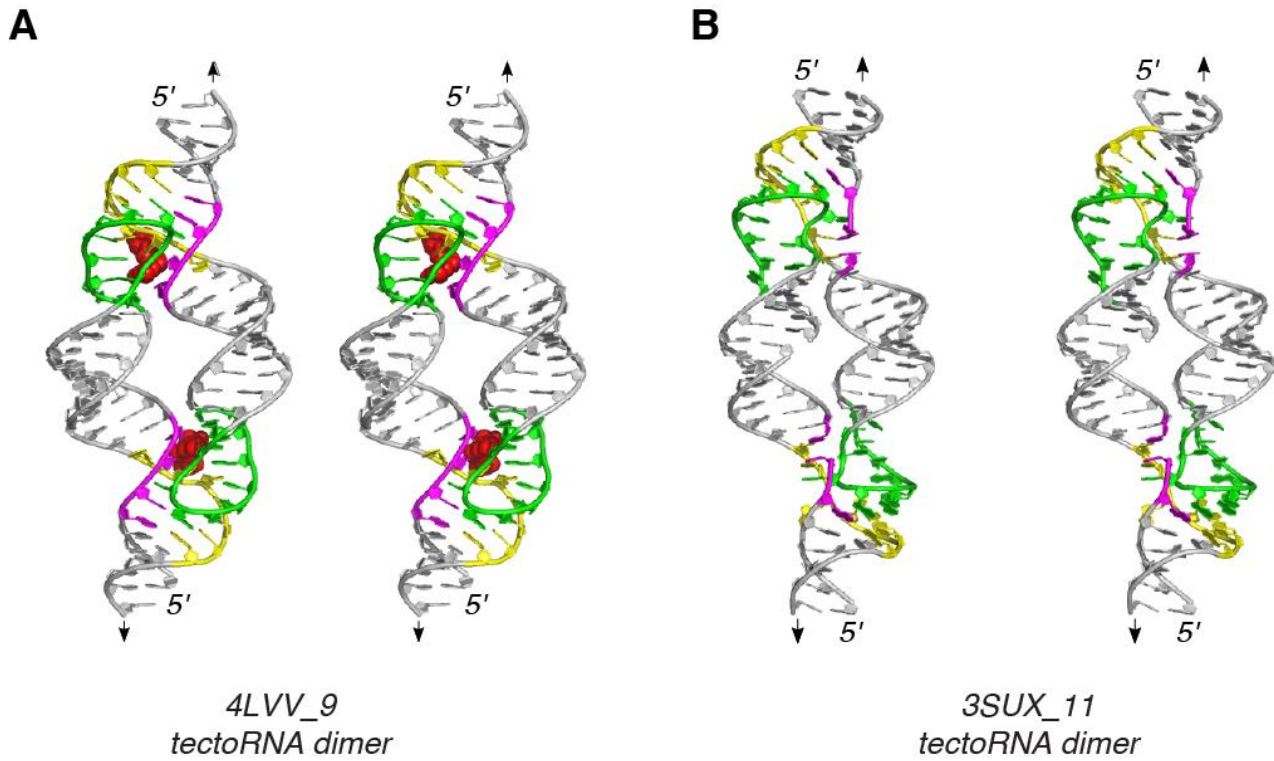

**Figure S2: Stereographic images of the 4LVV\_9 and 3SUX\_11 tectoRNA models.** (A) 4LVV tectoRNA dimer shows that a connector stem of 9 bps are preferable to the one of 11 bps for promoting assembly in presence of folinic acid (FA). (B) 3SUX tectoRNA dimer with connector stems of 11 bps, in absence of FA.

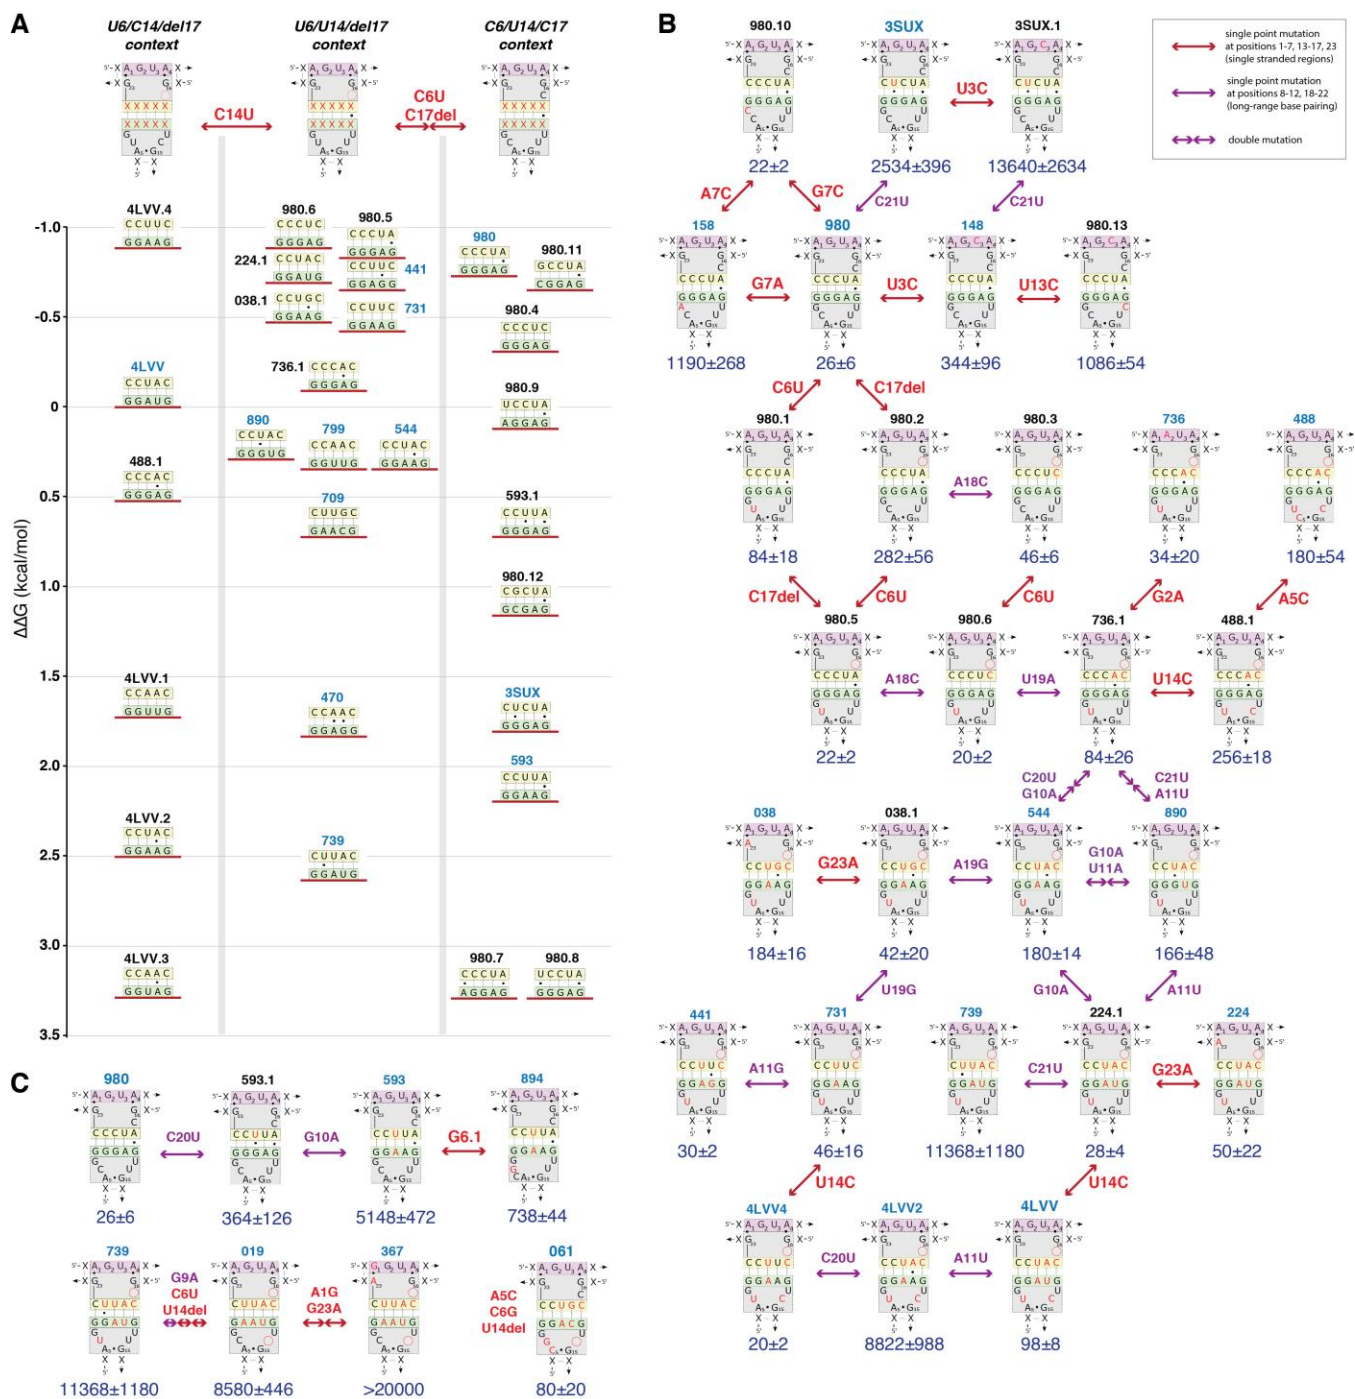

**Figure S3: Self-assembly properties of THF loop-receptor interactions.** (A) Comparison of the stability of long-range pairings in the 4LVV, 3SUX/980 and 441 contexts (4LVV context: U6, C14, del17; 3SUX/980 context: C6, U14, C17; 441 context: U6, U14, del17). Names in blue and black are for natural and artificial loop-receptors, respectively. (B) Mutational network of most loop-receptor variants: point mutations in single stranded regions 1-7, 13-17 and 23 are indicated in red, those in the long-range pairing (8-12; 18-22) are indicated in violet. The number of arrows between two 2D loop-receptor diagrams indicates the number of point mutations between them. Kd values (in nM) are indicated under each diagram in blue. (C) Additional loop-receptors in the U14del structural context (e.g. 019, 367 and 061) or with the mutation G6.1 (894).

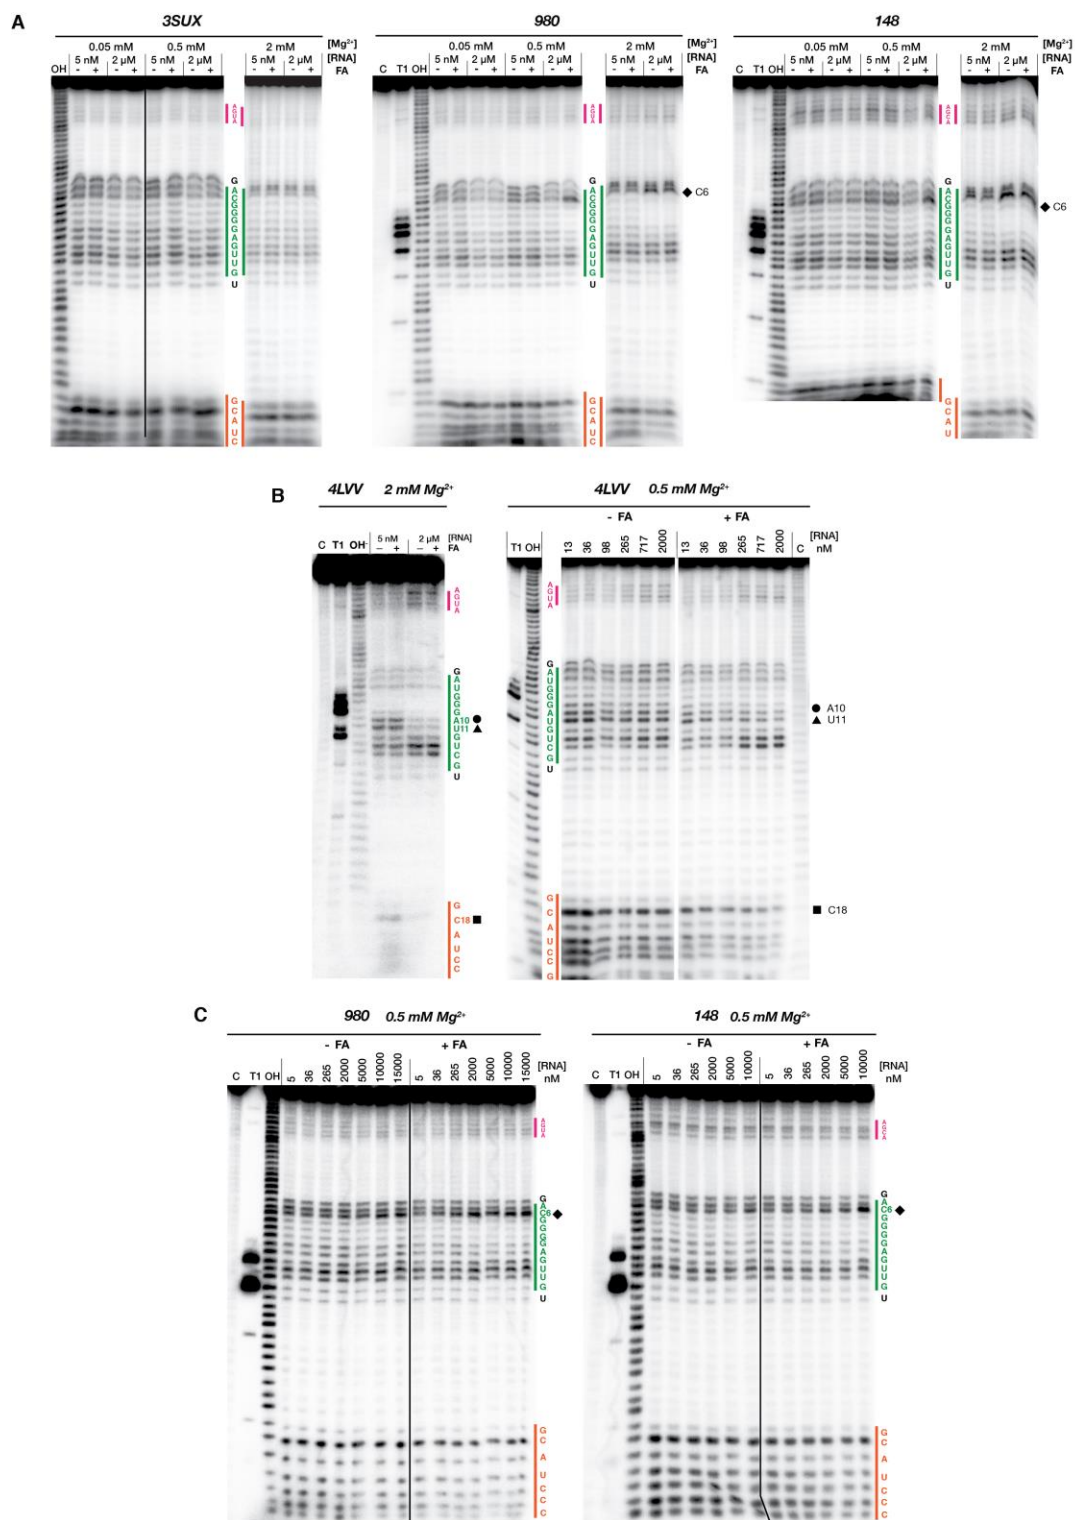

**Figure S4: Lead(II)-induced cleavage analysis of 4LVV, 980 and 148 tectoRNAs in absence or presence of 200 μM FA.** Typical gels are shown. Cleavage experiments were carried out with 10 mM Pb(II) for 5 min at various concentrations of Mg(OAc)<sub>2</sub> at 20°C as described in the Materials and Methods section. Lead cleavage patterns for: (A) 3SUX, 980 and 148 at 0.05, 0.5 and 2 mM Mg(OAc)<sub>2</sub>, (B) 4LVV at 0.5 and 2 mM Mg(OAc)<sub>2</sub>, (C) 980 and 148 at 0.5 mM Mg(OAc)<sub>2</sub>.

## D. Supplemental References

1. Ames, T.D., Rodionov, D.A., Weinberg, Z. and Breaker, R.R. (2010) A eubacterial riboswitch class that senses the coenzyme tetrahydrofolate. *Chemistry & biology*, **17**, 681-685.
2. Peselis, A. and Serganov, A. (2014) Themes and variations in riboswitch structure and function. *Biochimica et biophysica acta*, **1839**, 908-918.
3. Leontis, N.B. and Westhof, E. (2001) Geometric nomenclature and classification of RNA base pairs. *RNA*, **7**, 499-512.
4. Jaeger, L., Verzemnieks, E.J. and Geary, C. (2009) The UA\_handle: a versatile submotif in stable RNA architectures. *Nucleic Acids Res.*, **37**, 215--230.
